# Supplementary material for: A disassembly-driven mechanism explains F-actin-mediated chromosome transport in starfish oocytes
Source: eLife journal article supplement (doi:10.7554/elife.31469), 2018-01-19

Figure 4-figure supplement 1.

**A** Untreated control experiments

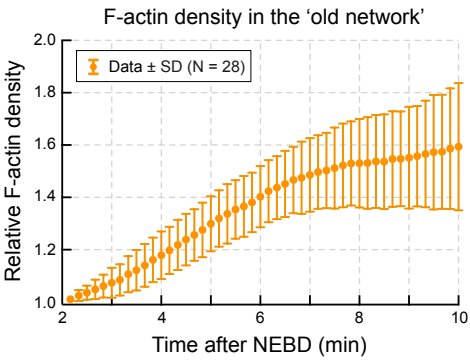

**B** UtrCH titration experiments

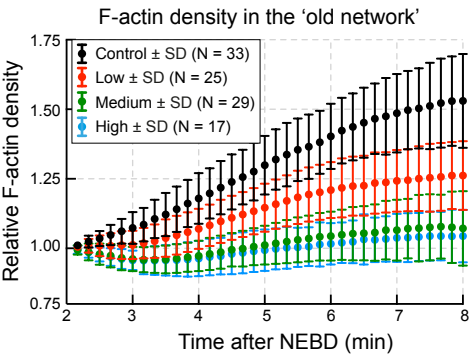

**C** Latrunculin A experiments

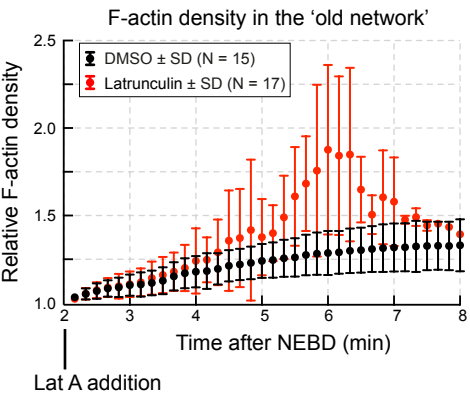

**D** SMIFH2 experiments

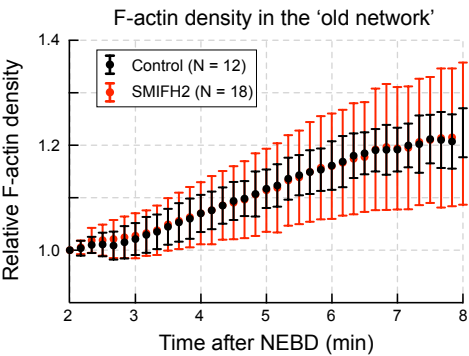

Supplement: supp [file elife-31469-supp-v1.zip]
