# Supplementary material for: A disassembly-driven mechanism explains F-actin-mediated chromosome transport in starfish oocytes
Source: eLife journal article supplement (doi:10.7554/elife.31469), 2018-01-19

Figure 6-figure supplement 1.

A Best fitting sets of parameters of network response to gradual stabilization

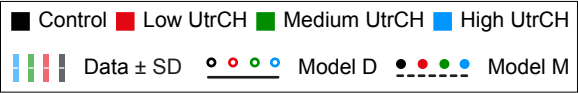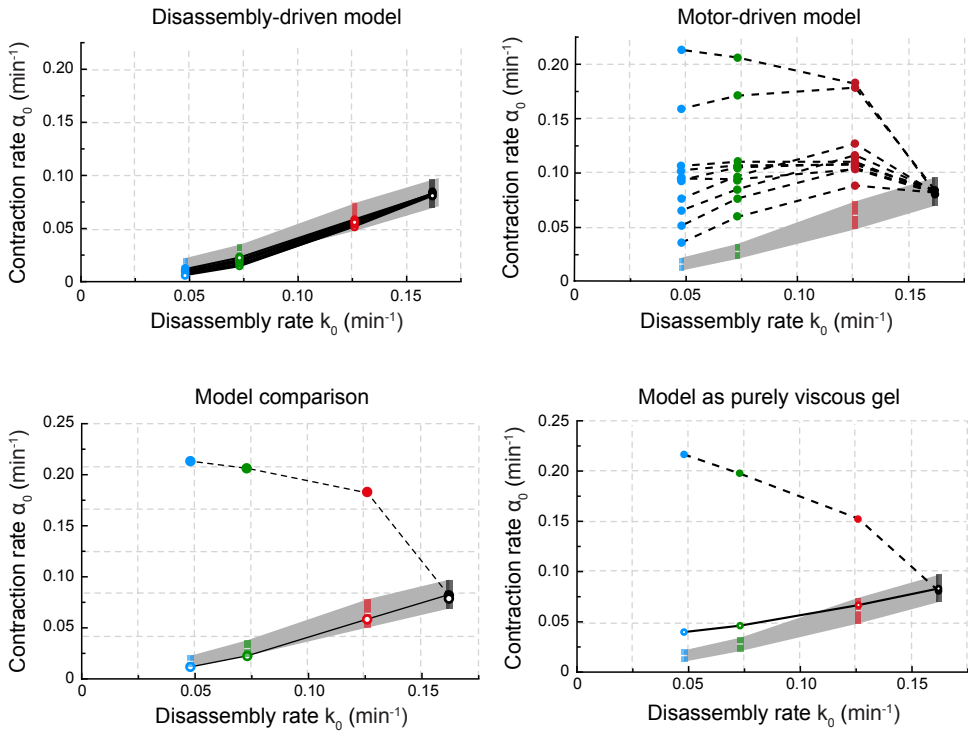

B Elasticity as function of contraction

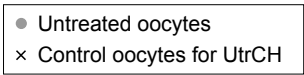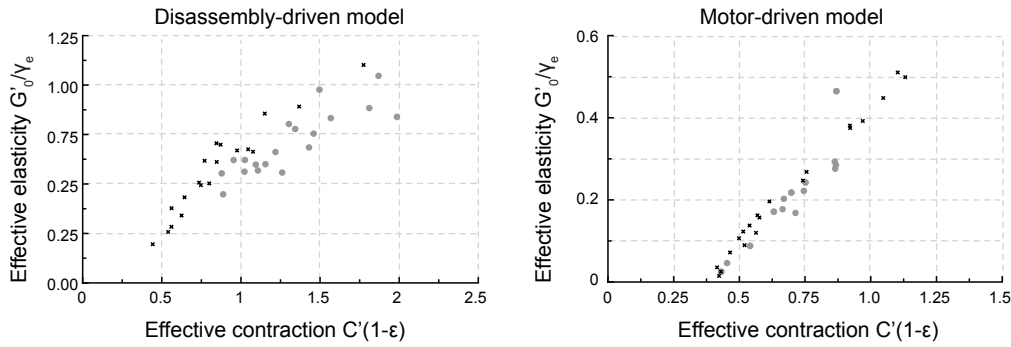

Supplement: supp [file elife-31469-supp-v1.zip]
