# Supplementary material for: A disassembly-driven mechanism explains F-actin-mediated chromosome transport in starfish oocytes
Source: eLife journal article supplement (doi:10.7554/elife.31469), 2018-01-19
Supplement: supp [file elife-31469-supp-v1.zip]

Archive with 18 entries (18 files):
- elife_poa_e31469_Supplementary_File_6.m
- elife_poa_e31469_Figure_5_figure_supplement_1.pdf
- elife_poa_e31469_Supplementary_File_1.zip
- elife_poa_e31469_Video_2.mov
- elife_poa_e31469_Video_1.mov
- elife_poa_e31469_Figure_4_figure_supplement_1.pdf
- elife_poa_e31469_Figure_6_figure_supplement_1.pdf
- elife_poa_e31469_Supplementary_File_4.docx
- elife_poa_e31469_Figure_8_figure_supplement_1.pdf
- elife_poa_e31469_Supplementary_File_2.docx
- elife_poa_e31469_Transparent_Reporting_File.pdf
- elife_poa_e31469_Supplementary_File_3.docx
- elife_poa_e31469_Figure_1_figure_supplement_1.pdf
- elife_poa_e31469_Figure_3_figure_supplement_1.pdf
- elife_poa_e31469_Video_3.mov
- elife_poa_e31469_Figure_7_figure_supplement_1.pdf
- elife_poa_e31469_Supplementary_File_5.txt
- elife_poa_e31469_Video_4.mov
