# Supplementary material for: A disassembly-driven mechanism explains F-actin-mediated chromosome transport in starfish oocytes
Source: eLife journal article supplement (doi:10.7554/elife.31469), 2018-01-19
Supplement: supp [file elife-31469-supp-v1.zip › elife_poa_e31469_Supplementary_File_2.docx]

**Supplementary file 2.** Dimensionless viscoelastic parameters for UtrCH injections

|  |  |  |  |  |  | m |  |
| --- | --- | --- | --- | --- | --- | --- | --- |
| Model M | 0.0561 | 1.0805 | 0.3913 | 3.7600 | 2 | 2 | 1 |
| Model D | 2.1842 | 3.3799 | 0.9993 | 1.4649 | 2 | 1 | 1 |
