# Supplementary material for: A disassembly-driven mechanism explains F-actin-mediated chromosome transport in starfish oocytes
Source: eLife journal article supplement (doi:10.7554/elife.31469), 2018-01-19
Supplement: supp [file elife-31469-supp-v1.zip › elife_poa_e31469_Supplementary_File_3.docx]

**Supplementary file 3.** Dimensionless viscoelastic parameters for Latrunculin A treatments

|  |  |  |  |  |  | m |  |
| --- | --- | --- | --- | --- | --- | --- | --- |
| Model M | 0.1258 | 0.9486 | 0.9873 | 16.826 | 2 | 2 | 2 |
| Model D | 1.1308 | 1.2118 | 0.9874 | 13.073 | 2 | 1 | 2 |
