# Supplementary material for: A disassembly-driven mechanism explains F-actin-mediated chromosome transport in starfish oocytes
Source: eLife journal article supplement (doi:10.7554/elife.31469), 2018-01-19
Supplement: supp [file elife-31469-supp-v1.zip › elife_poa_e31469_Supplementary_File_4.docx]

**Supplementary file 4.** Dimensionless viscoelastic parameters for SMIFH2 treatments

|  |  |  |  |  |  | m |  |
| --- | --- | --- | --- | --- | --- | --- | --- |
| Model M | 2.8686 | 1.3007 | 0.5198 | 12.039 | 2 | 2 | 1 |
| Model D | 0.9814 | 0.9625 | 0.3340 | 8.5470 | 1 | 1 | 1 |
