# Supplementary figures and images for: A disassembly-driven mechanism explains F-actin-mediated chromosome transport in starfish oocytes
Source: eLife journal article supplement (doi:10.7554/elife.31469), 2018-01-19

Figure 7-figure supplement 1.

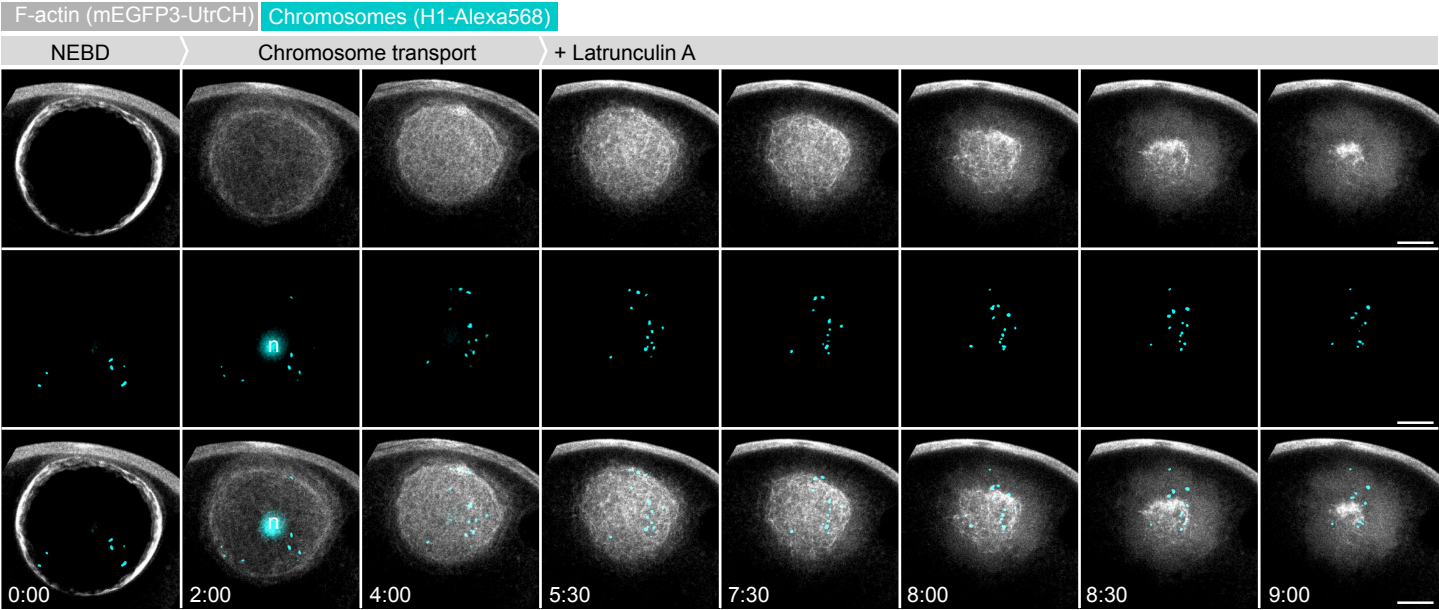

Supplement: supp [file elife-31469-supp-v1.zip]

Figure 3-figure supplement 1.

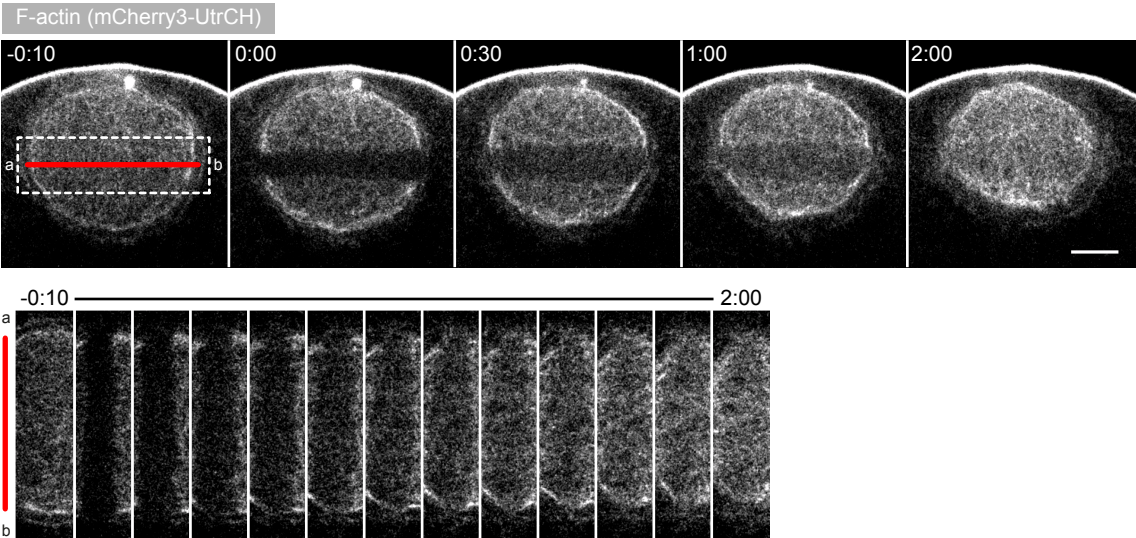

Supplement: supp [file elife-31469-supp-v1.zip]

Figure 5-figure supplement 1.

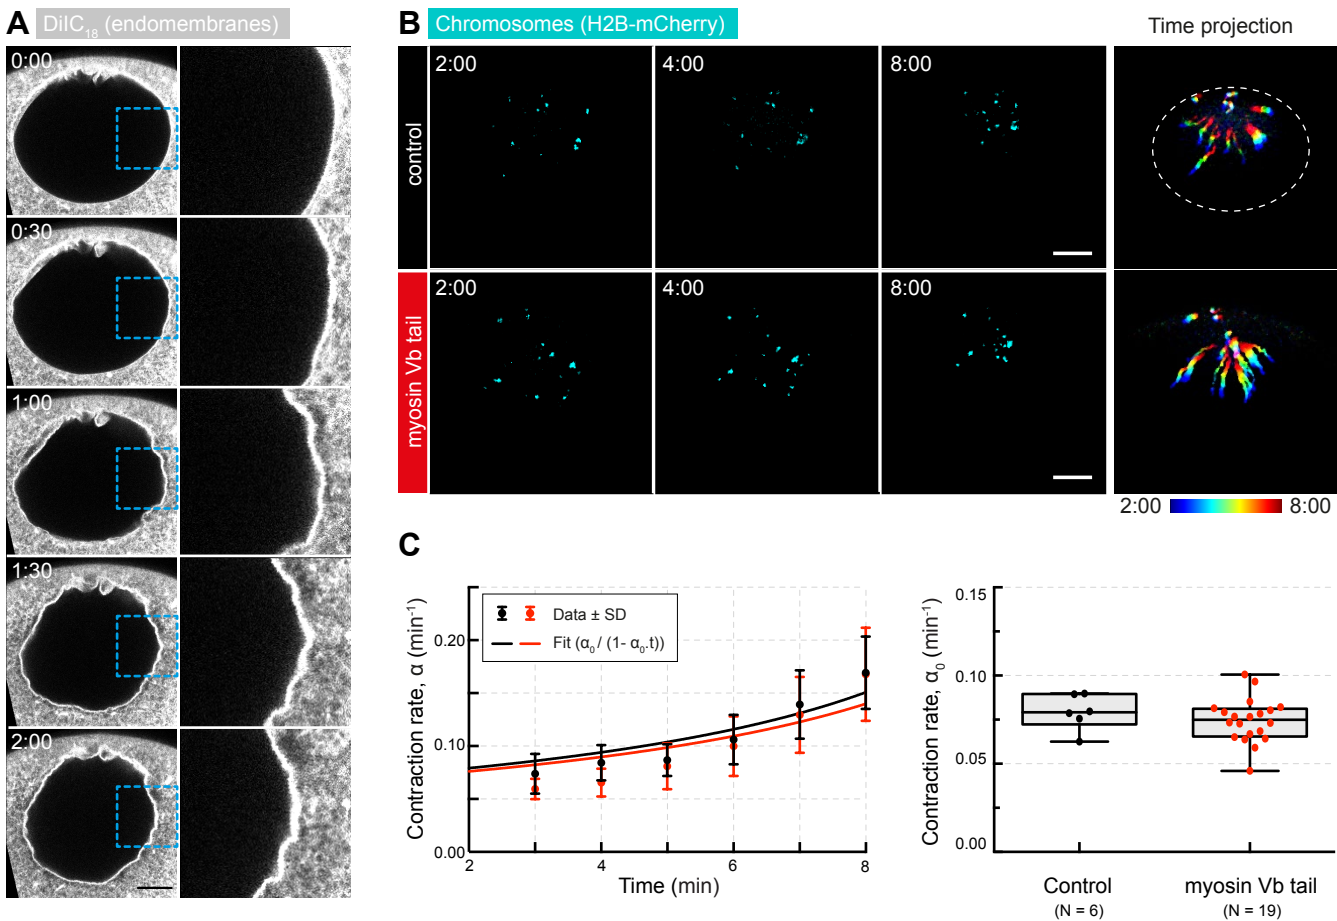

Supplement: supp [file elife-31469-supp-v1.zip]

Figure 1-figure supplement 1.

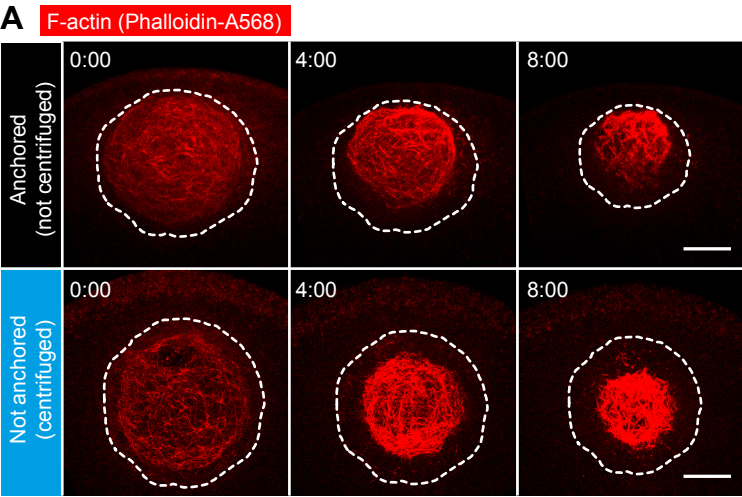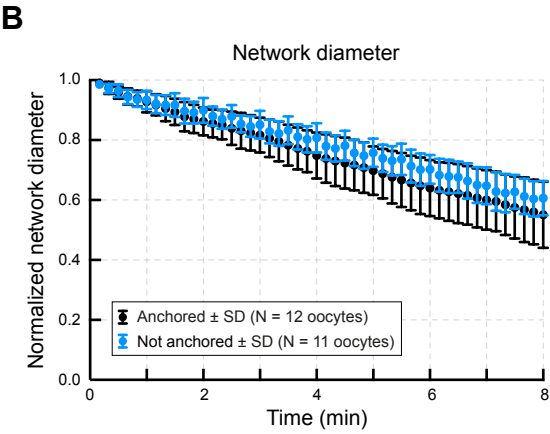

Supplement: supp [file elife-31469-supp-v1.zip]

Figure 8-figure supplement 1.

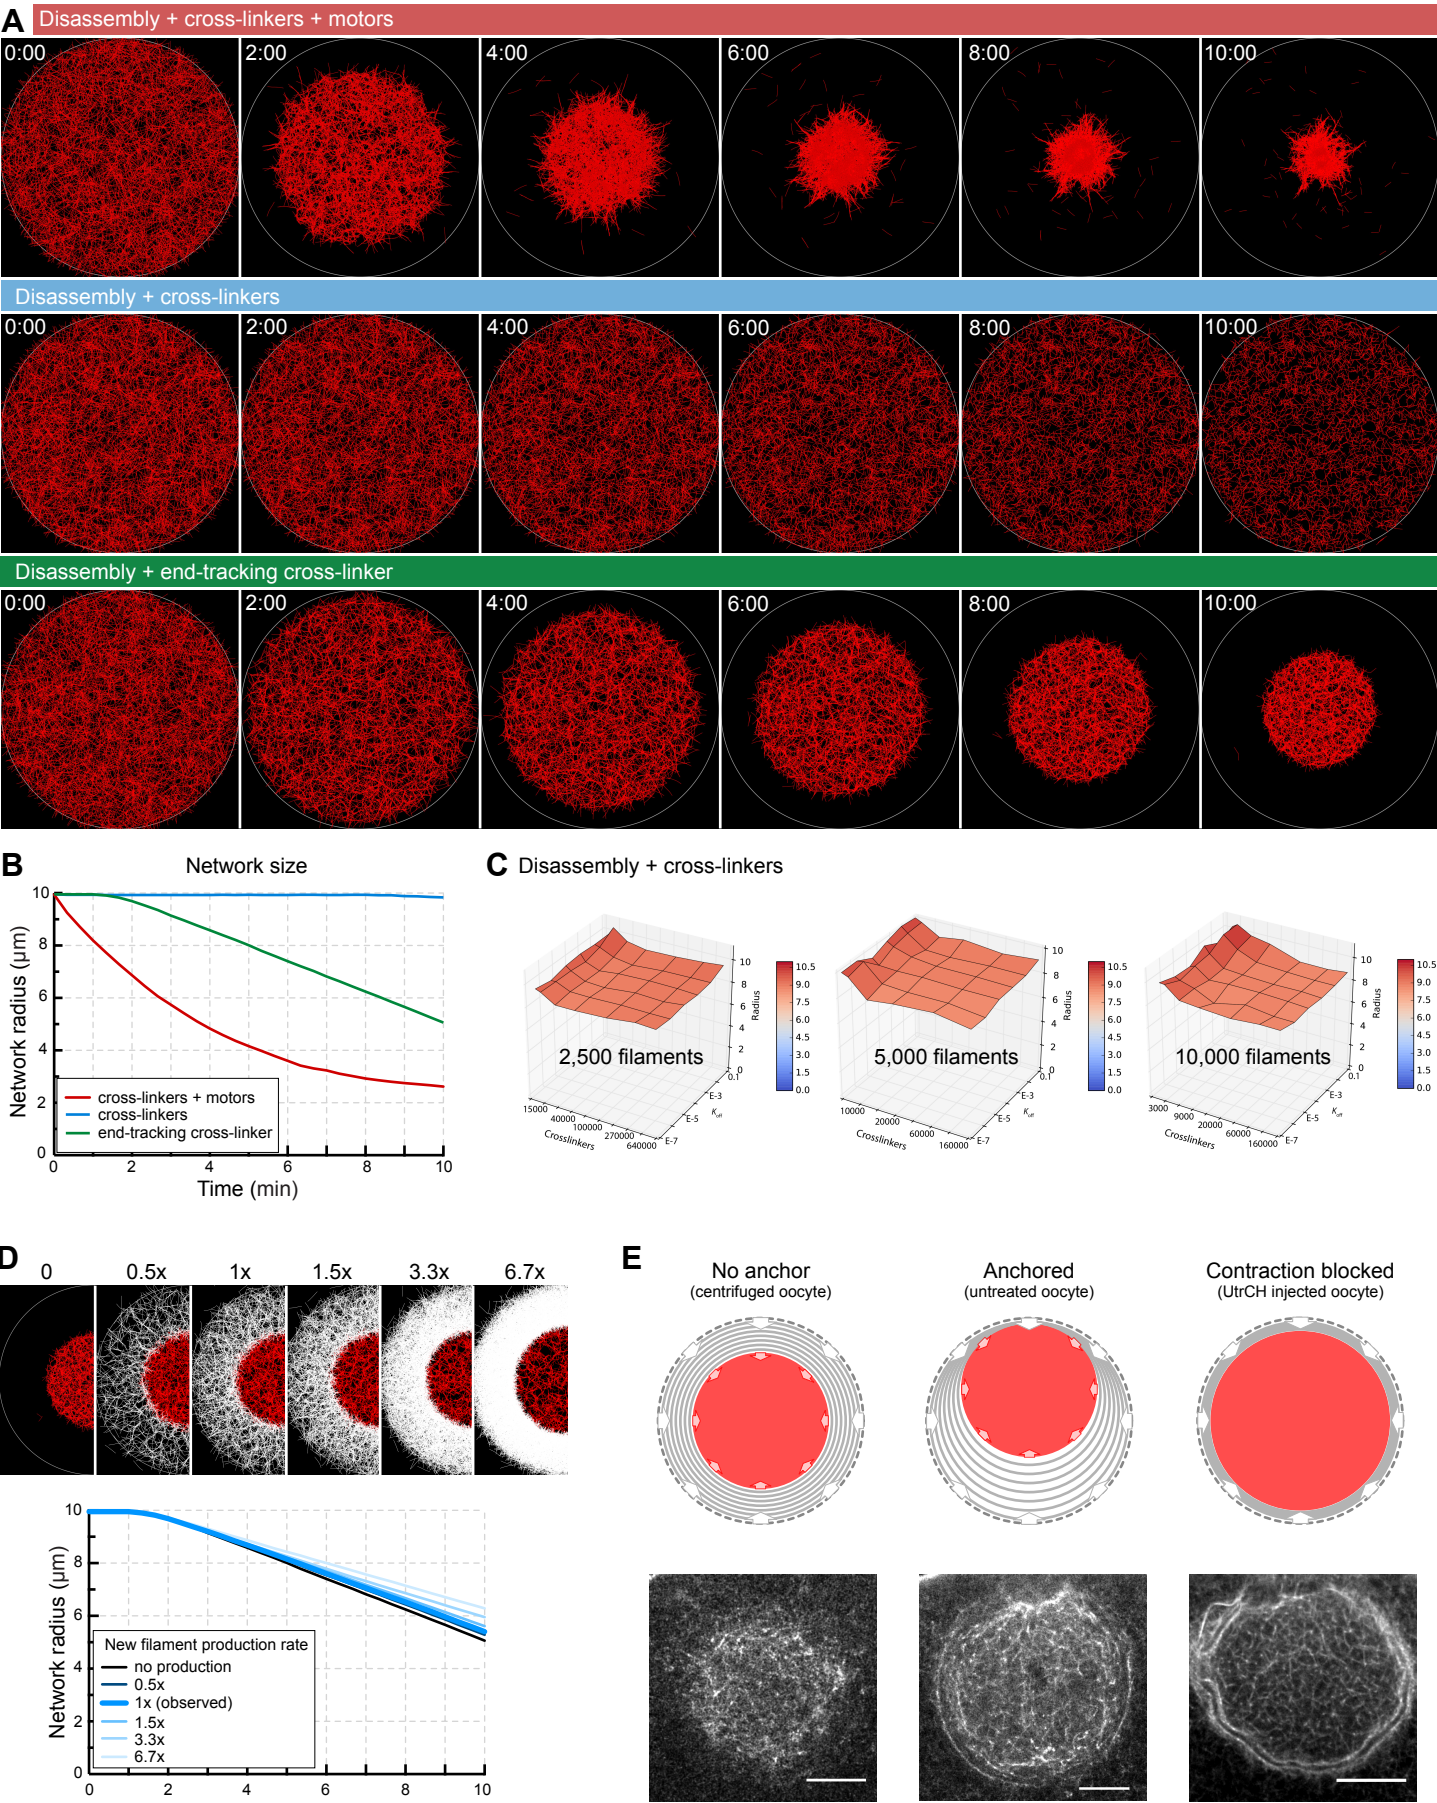

Supplement: supp [file elife-31469-supp-v1.zip]
